# Supplementary material
Source: PubMed Central journal article supplement (PMC2881502)
Supplement: blood-2009-10-251082_1.pdf [file blood-2009-10-251082_1.pdf]

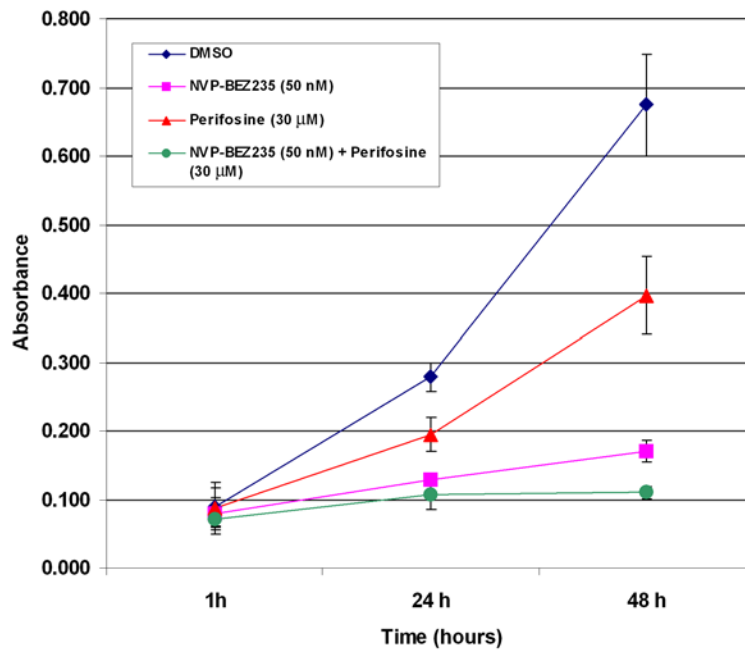

Supplemental Figure 1: Combinatorial effect of perifosine and NVP-BEZ235 on BC-1 cells. BC-1 cells were incubated with a combination of 30 micromolar perifosine and 50 nanomolar NVP-BEZ235. Cells were analyzed at the indicated times using an MTS assay as described in the methods section.

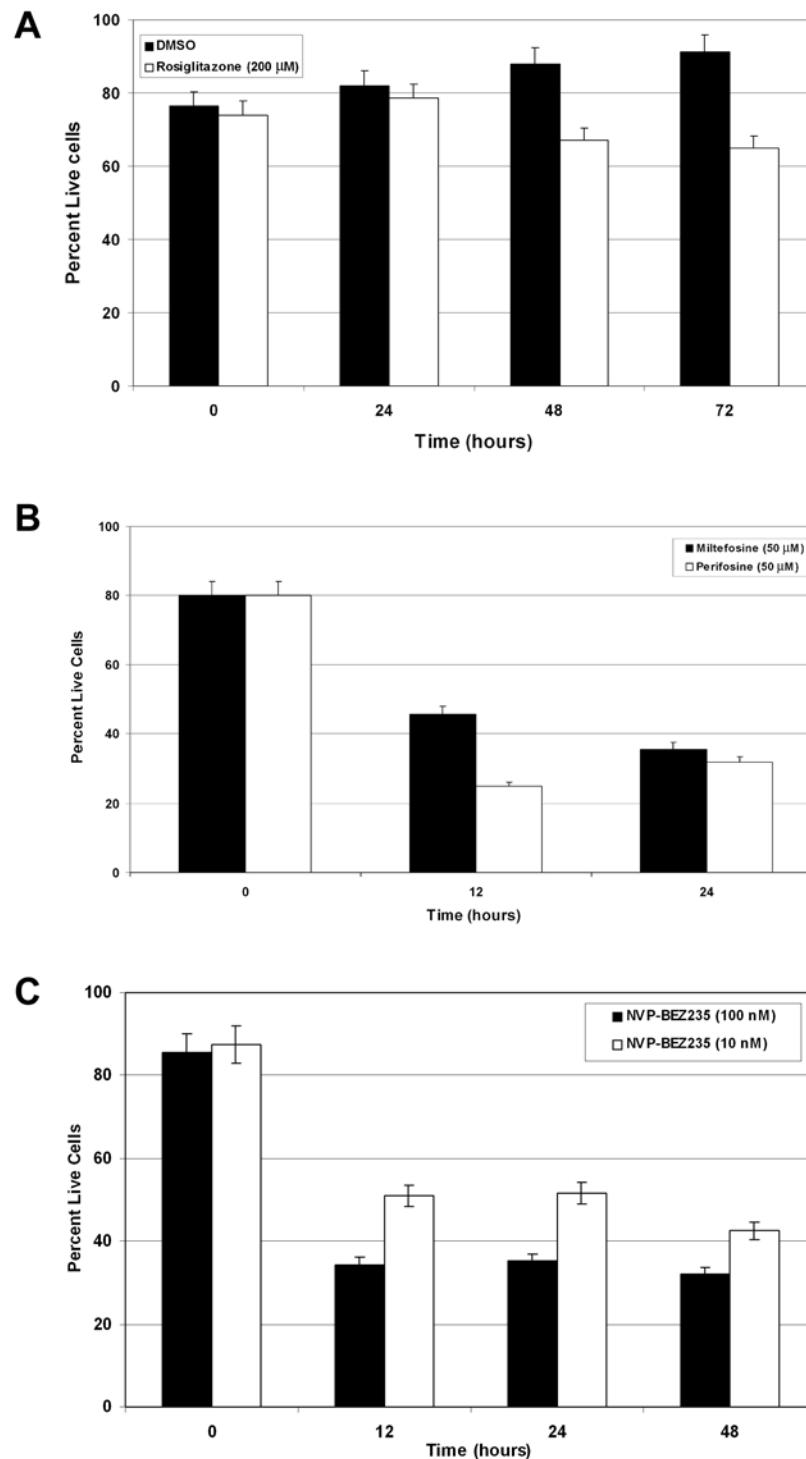

Supplemental Figure 2: Effects of rosiglitazone, miltefosine, perifosine and NVP-BEZ235 on PEL cells. BCP-1 cells ( $2 \times 10^5$ ) were treated with the indicated concentrations of rosiglitazone (A), miltefosine or perifosine (B) and NVP-BEZ235 (C) for different time periods. Cells were harvested at the indicated time points and Trypan blue staining was performed to determine the percentage of live cells in the drug treated cultures.
